# Supplementary material for: First-principles calculation of the electronic and optical properties of a new two-dimensional carbon allotrope: tetra-penta-octagonal graphene
Source: Royal Society of Chemistry journal article supplement (doi:10.1039/c9cp04863d), 2019-01-01
Supplement: c9cp04863d1.pdf [file c9cp04863d1.pdf]

## 1 Electronic Supplementary Information (ESI)

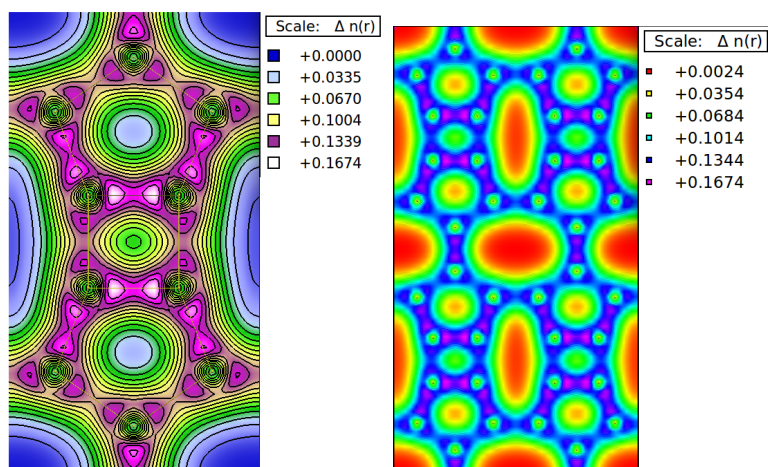

Figure S.1: Charge density for unit cell (left) and that for a 2x2x1 supercell (right)

Table S.1: Table to show the formation energy of different structures.

| System  | N  | B | C | Formation energy (eV) |
|---------|----|---|---|-----------------------|
| C10     | 10 | 0 | 0 | -8.5773429            |
| 4N4B2C  | 4  | 4 | 2 | -6.8251887            |
| 4N2tB4C | 4  | 2 | 4 | -6.6635473            |
| 2N4B4C  | 2  | 4 | 4 | -7.2402774            |
| 4N2aB4C | 4  | 2 | 4 | -6.8675997            |
| 9C1Bp   | 0  | 1 | 9 | -8.2283812            |
| 9C1Bt   | 0  | 1 | 9 | -8.1808443            |
| 9C1Np   | 1  | 0 | 9 | -8.0380544            |
| 9C1Nt   | 1  | 0 | 9 | -8.1088692            |
| 2tN8C   | 2  | 0 | 8 | -7.8113438            |
| 2aN8C   | 2  | 0 | 8 | -7.5329196            |
| 4taN6C  | 4  | 0 | 6 | -6.8986084            |
| 6N2B2C  | 6  | 2 | 2 | -5.8872227            |

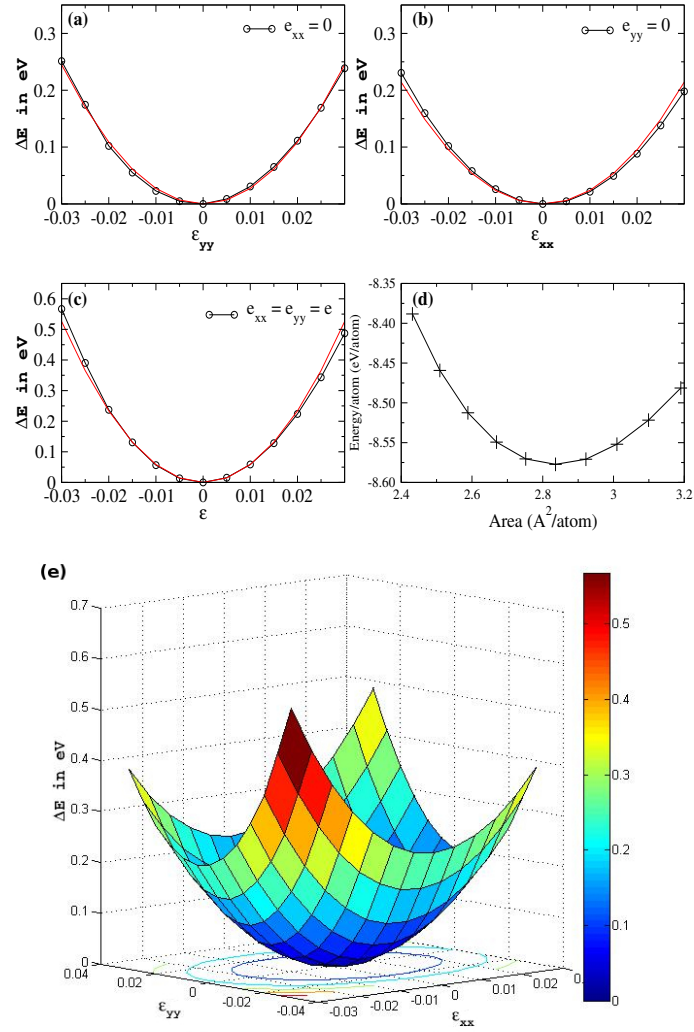

Figure S.2: (a) Strain energy for uniaxial strain along  $\vec{b}$  direction, (b) Strain energy for uniaxial strain along  $\vec{a}$  direction, (c) Strain energy graph for equal strain along both directions. Red curves show parabolic fit on the data. (d) Formation energy vs area per atom curve. (e) Strain energy surface under strain in both directions including uniaxial tensile, uniaxial compressive, biaxial tensile, biaxial compressive and asymmetric biaxial strains.

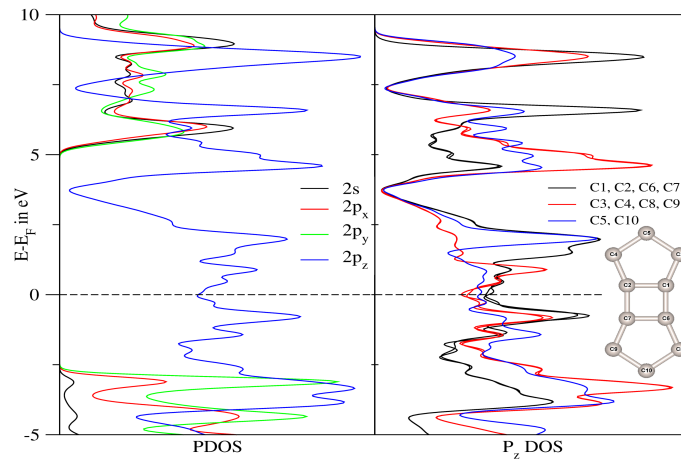

Figure S.3: Projected density of state (left). Partial density for  $p_z$  orbital for all ten carbon atoms classified in three bunches of similarity (right)

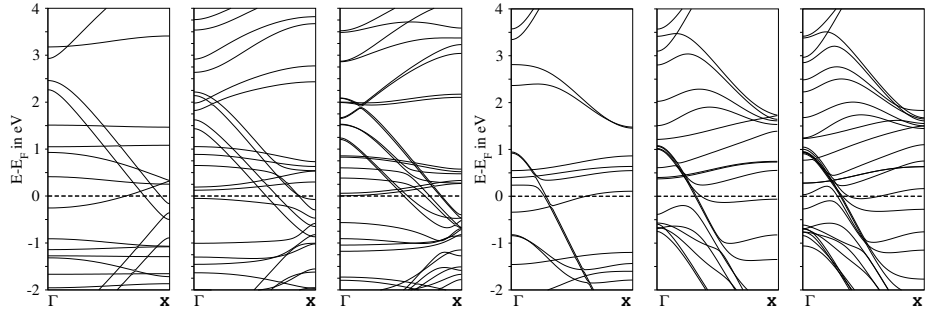

Figure S.4: Band structure for nano ribbons of larger width. (Left) Bands of NR1 for  $n = 1, 2$  &  $3$ . (Right) Bands of NR2 for  $n = 1, 2$  &  $3$

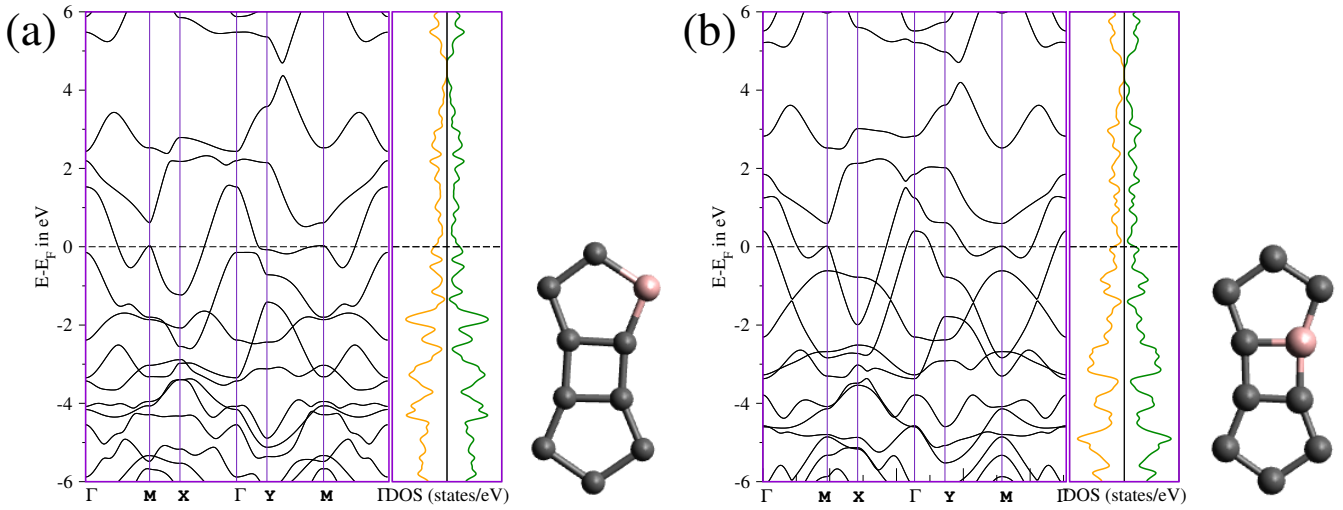

Figure S.5: (a) Boron doping in pentagon-octagon site. (b) Boron doping in tetragon-pentagon-octagon site.

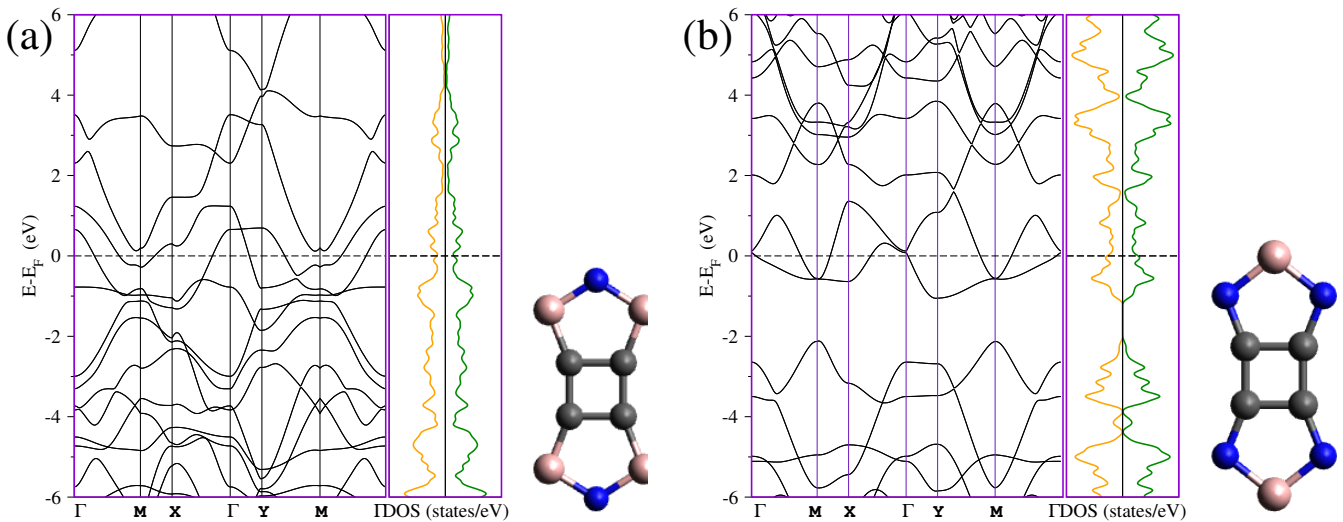

Figure S.6: (a)  $C_4B_4N_2$  system. (b)  $C_4B_2N_4$  system. Nitrogen-Boron co-doping keeping the carbon tetragonal ring unaltered.

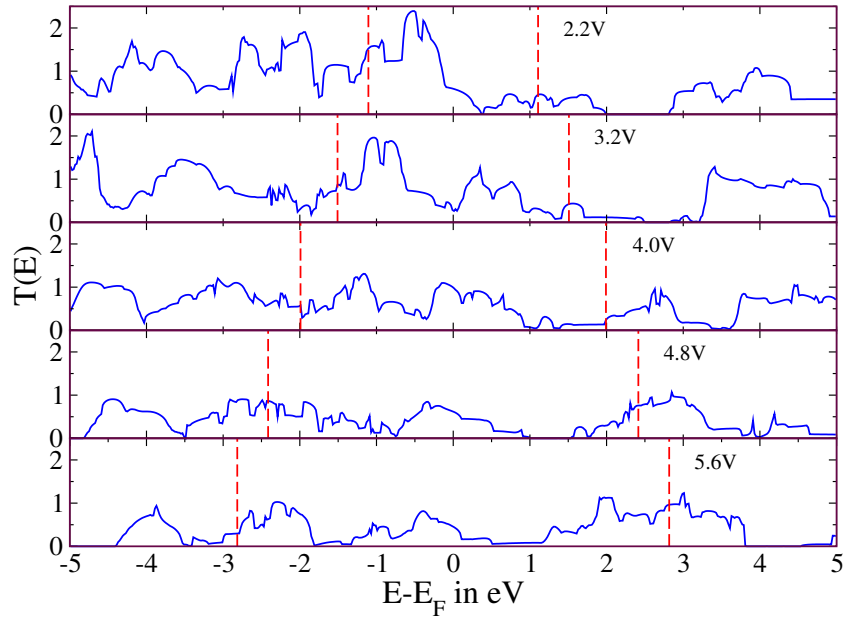

Figure S.7: The transmission function plotted with Fermi level shifted energy at different bias for device 1. The red dotted lines indicate the electrode Fermi levels

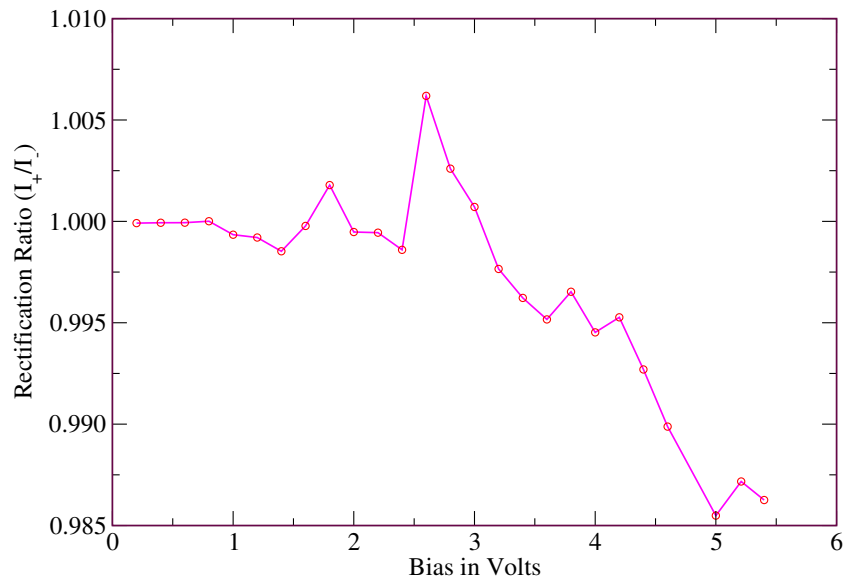

Figure S.8: Rectification ratio of device 1.

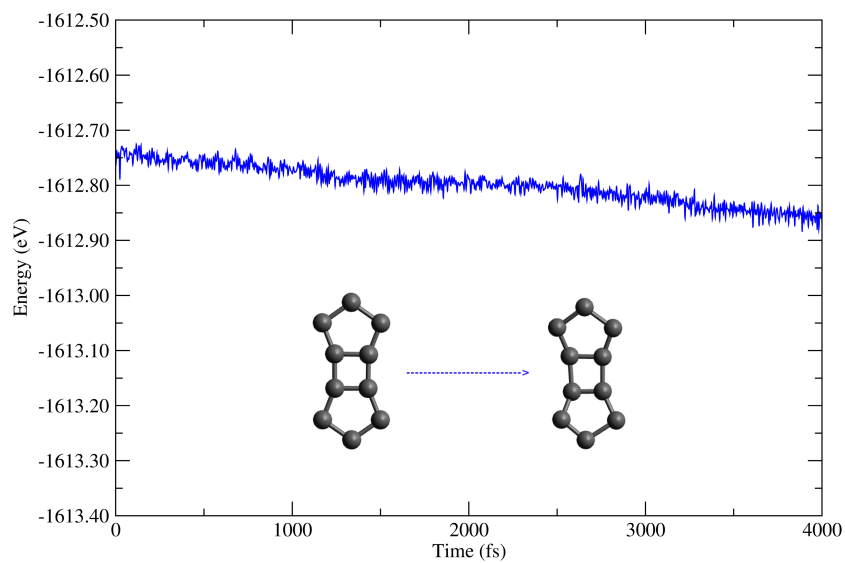

Figure S.9: E-t curve for AIMD simulation of TPO-graphene at 2000K with initial and final structures.

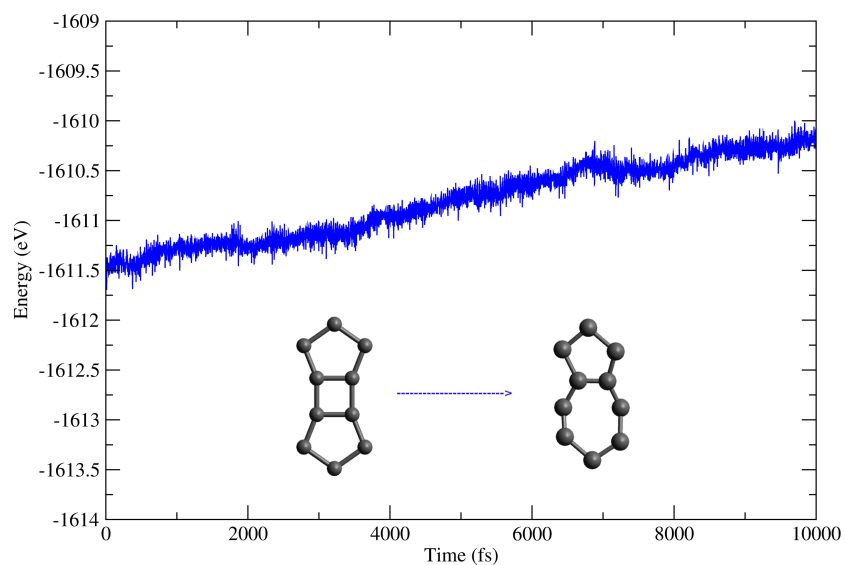

Figure S.10: E-t curve for AIMD simulation of TPO-graphene at 3000K with initial and final structures.

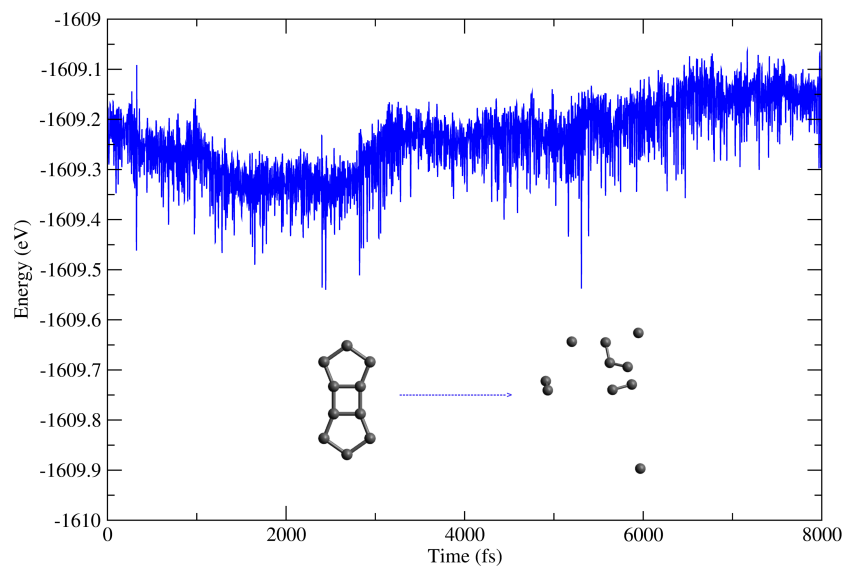

Figure S.11: E-t curve for AIMD simulation of TPO-graphene at 5000K with initial and final structures.

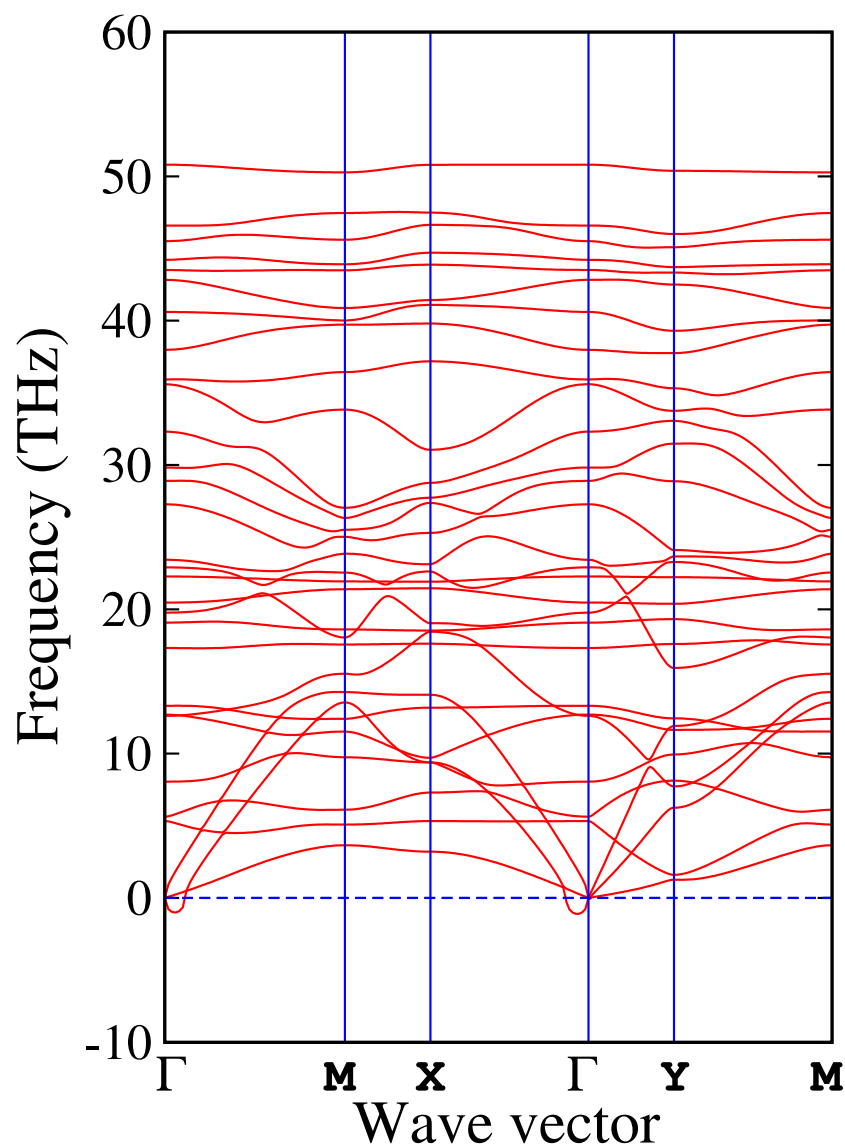

Figure S.12: Phonon spectra for Nitrogen doped at PO site structure. Ref. Fig.8(a)

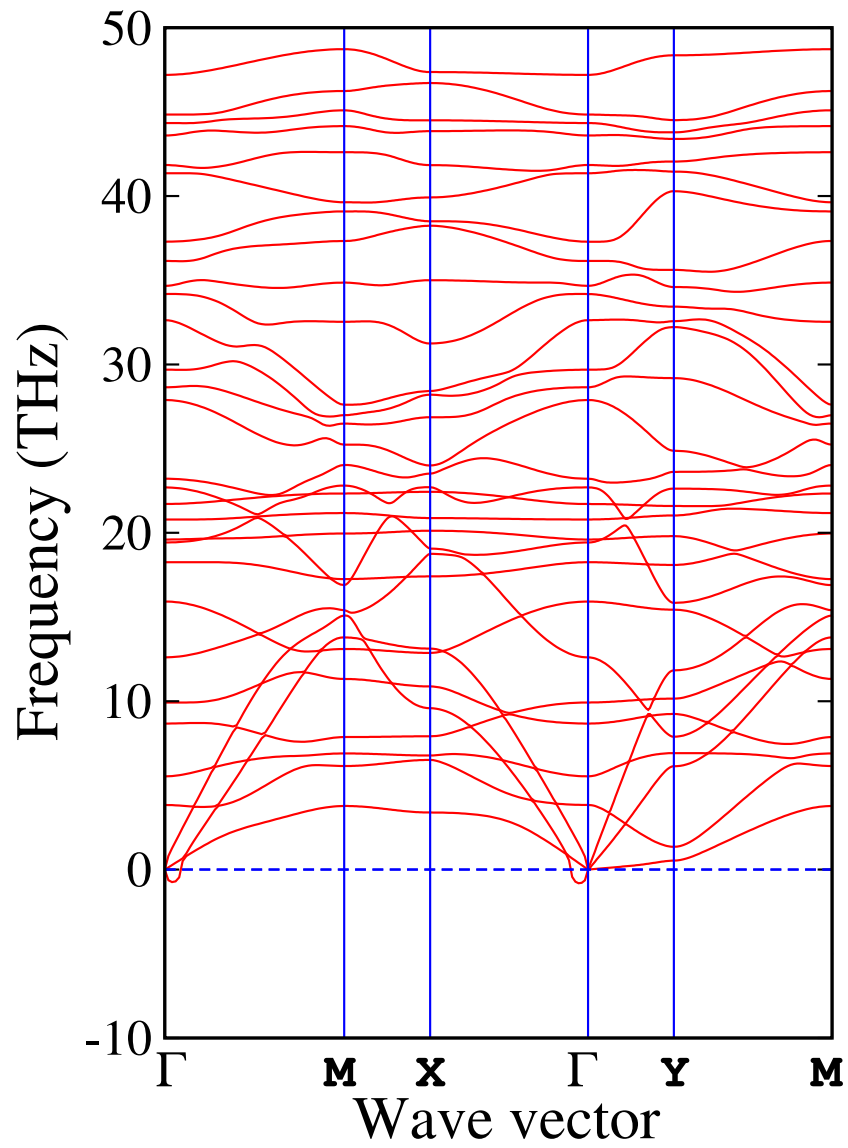

Figure S.13: Phonon spectra for Nitrogen doped at TPO site structure. Ref. Fig.8(b)

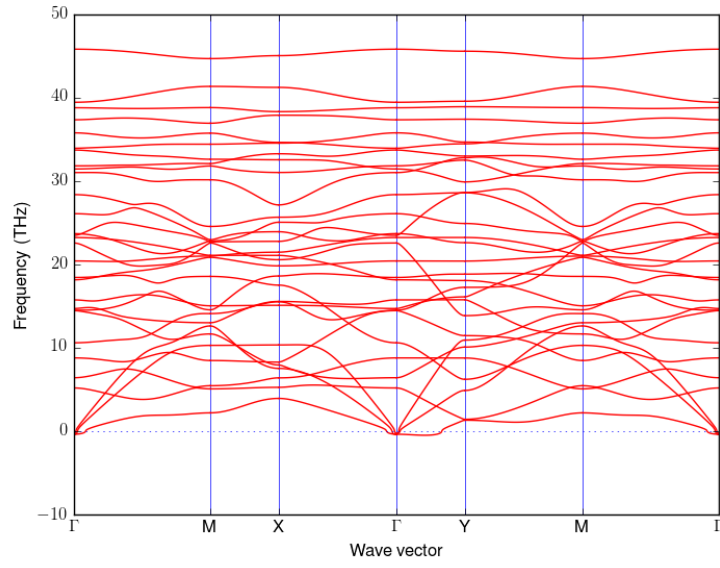

Figure S.14: Phonon spectra for  $C_4B_4N_{2a}$  structure. Ref. Fig.S.6(a)

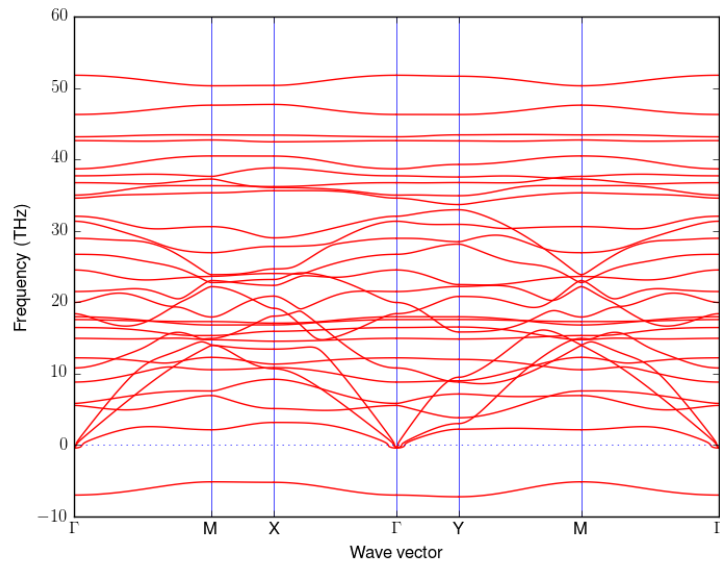

Figure S.15: Phonon spectra for  $C_4B_{2a}N_4$  structure. Ref. Fig.S.6(b)



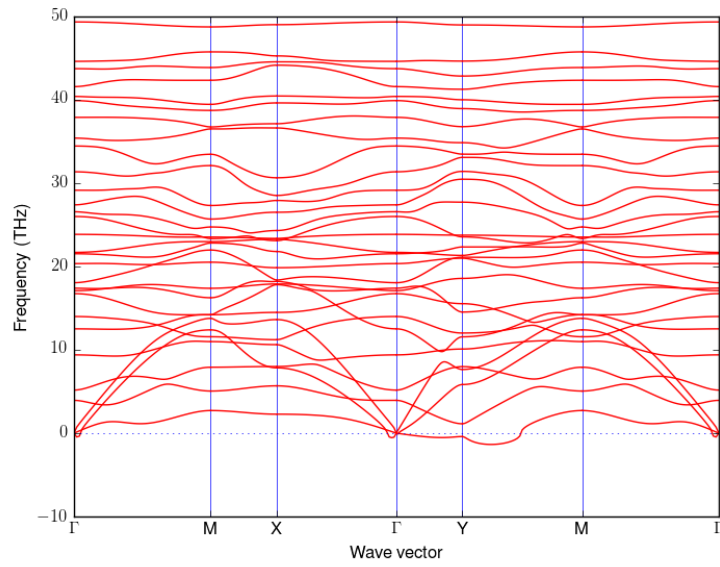

Figure S.16: Phonon spectra for  $C_9B_{1p}$  structure. Ref. Fig.S.5(a)

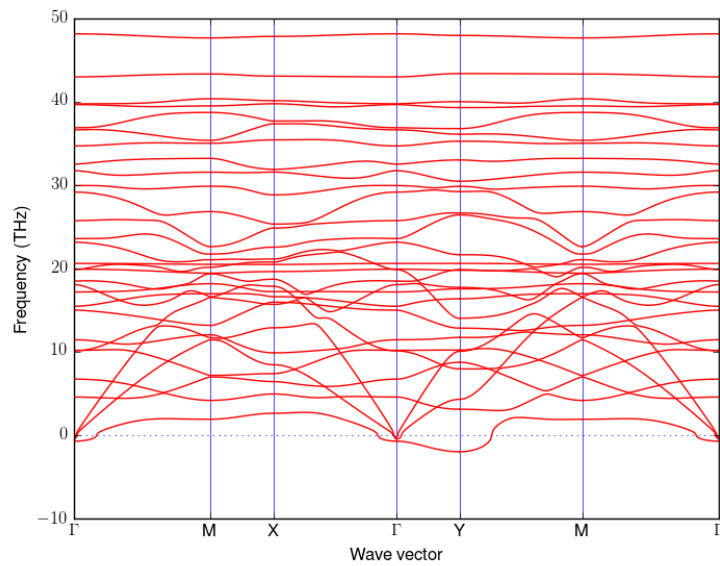

Figure S.17: Phonon spectra for  $C_2B_4N_4$  structure. Ref. Fig.9(b)
